# Supplementary material for: A Parameterization of Heterogeneous Hydrolysis of N 2 O 5 for 3-D Atmospheric Modelling: Improvement of Particulate Nitrate Prediction
Source: Copernicus journal article supplement (doi:10.5194/acp-2017-105), 2017-02-16
Supplement: Supplementary file 1 [file acp-2017-105-supplement.pdf]

*Supplement of*

**A Parameterization of Heterogeneous Hydrolysis of  $\text{N}_2\text{O}_5$   
for 3-D Atmospheric Modelling: Improvement of  
Particulate Nitrate Prediction**

**Y. Chen et al.**

*Correspondence to:* Y. Chen (chen@tropos.de) and R. Wolke (wolke@tropos.de)

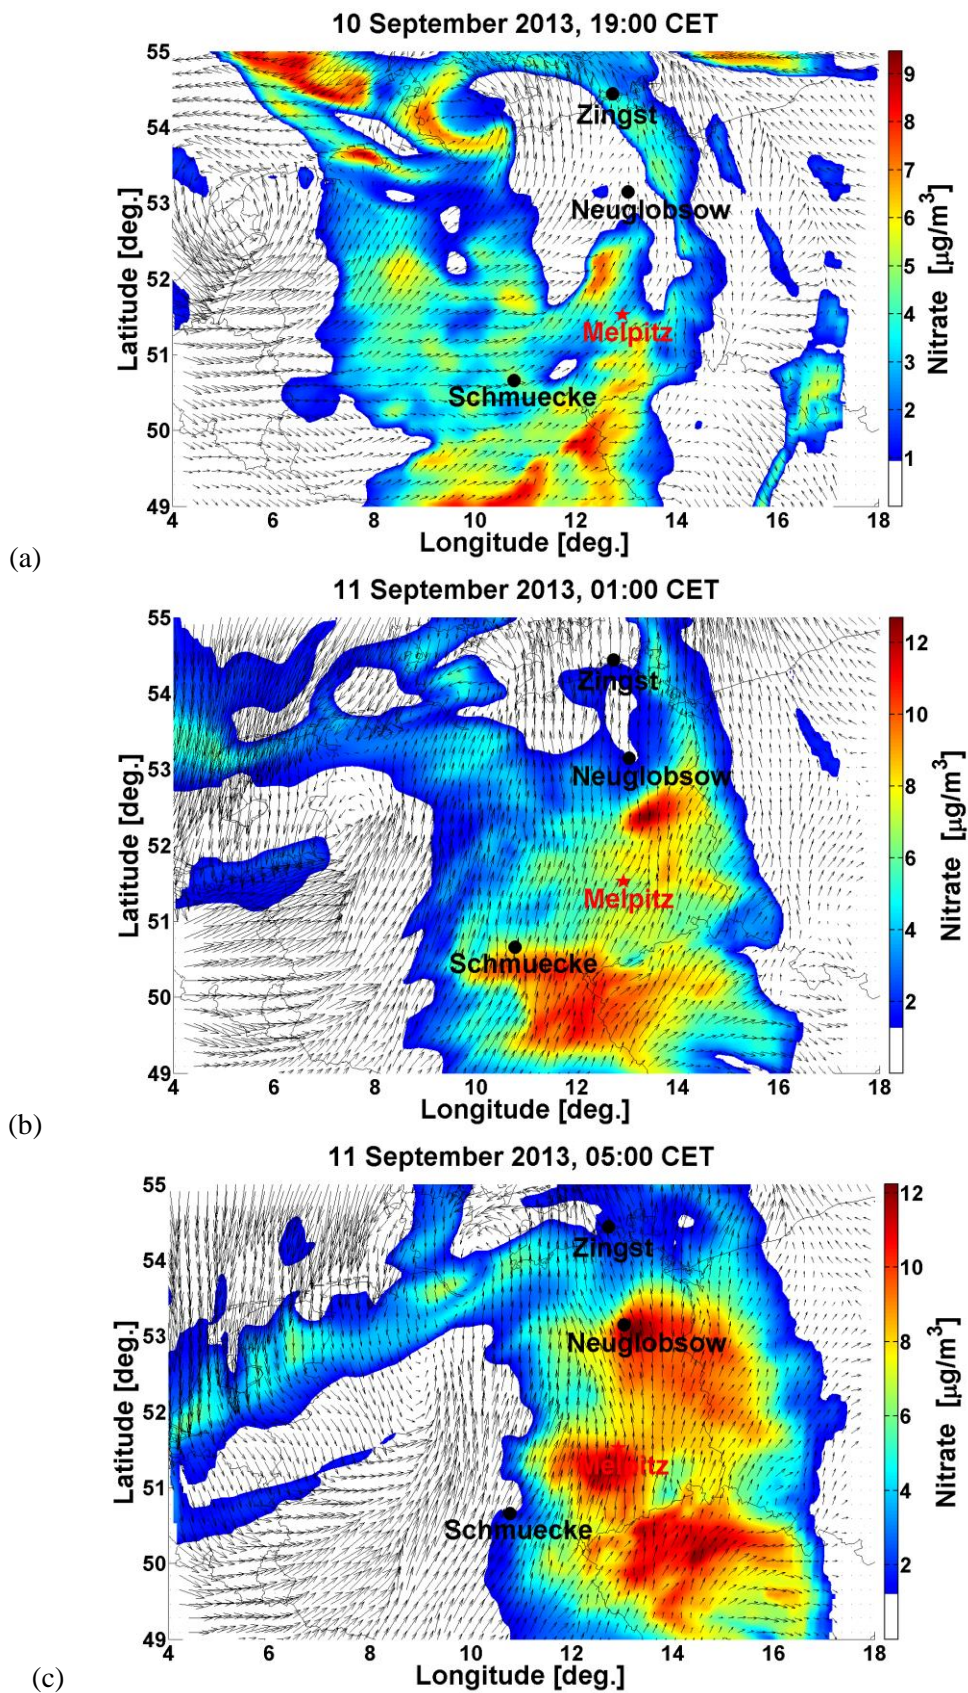

**Figure S1.** Spatial distribution of particulate nitrate mass concentration and wind pattern, modelled results of NewN2O5 case. (a) 2013-09-10, 19:00 CET; (b) 2013-09-11, 01:00 CET; (c) 2013-09-11, 05:00 CET.

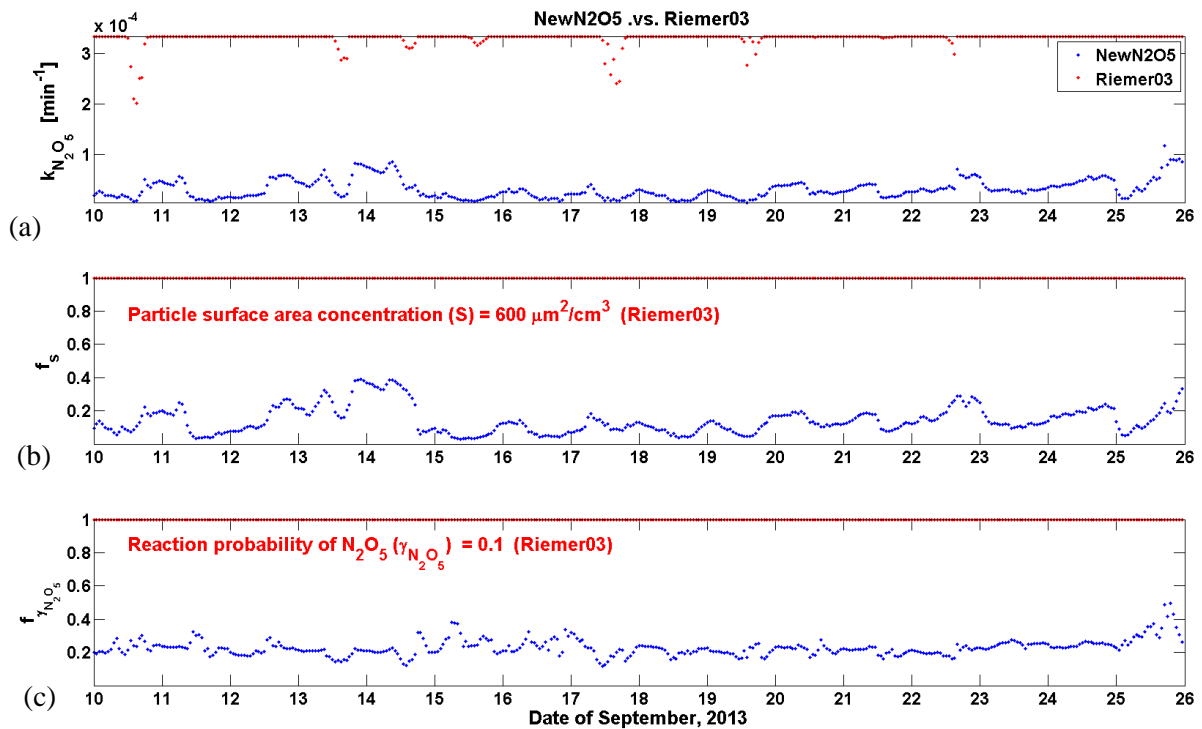

**Figure S2.** Comparison of modelled results at Melpitz between Riemer03 (red) and NewN2O5 (blue) cases. (a) Heterogeneous reaction constant of  $N_2O_5$ ; (b) factor of particle surface area concentration; (c) factor of reaction probability of  $N_2O_5$ .

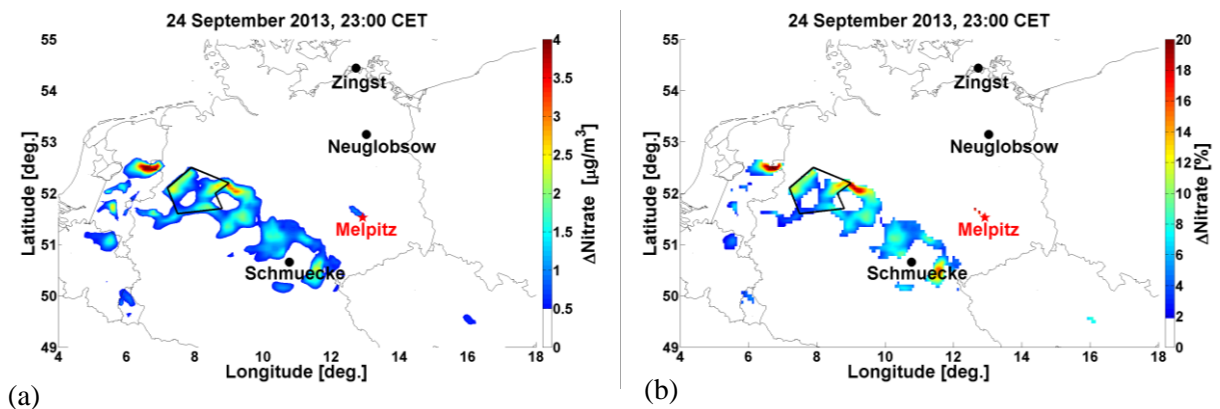

**Figure S3.** Horizontal distribution of modelled results at 24 September 23:00 CET, based on new  $N_2O_5$  scheme. (a) Difference of particulate nitrate mass concentration between with and without organic coating effect; (b) difference of particulate nitrate mass concentration in percentage between with and without organic coating effect, where with differences less than 2% or  $0.5 \mu\text{g}/\text{m}^3$  are indicated by white colour.
